# Supplementary material
Source: PubMed Central journal article supplement (PMC9722561)

## Supplemental Figure 1

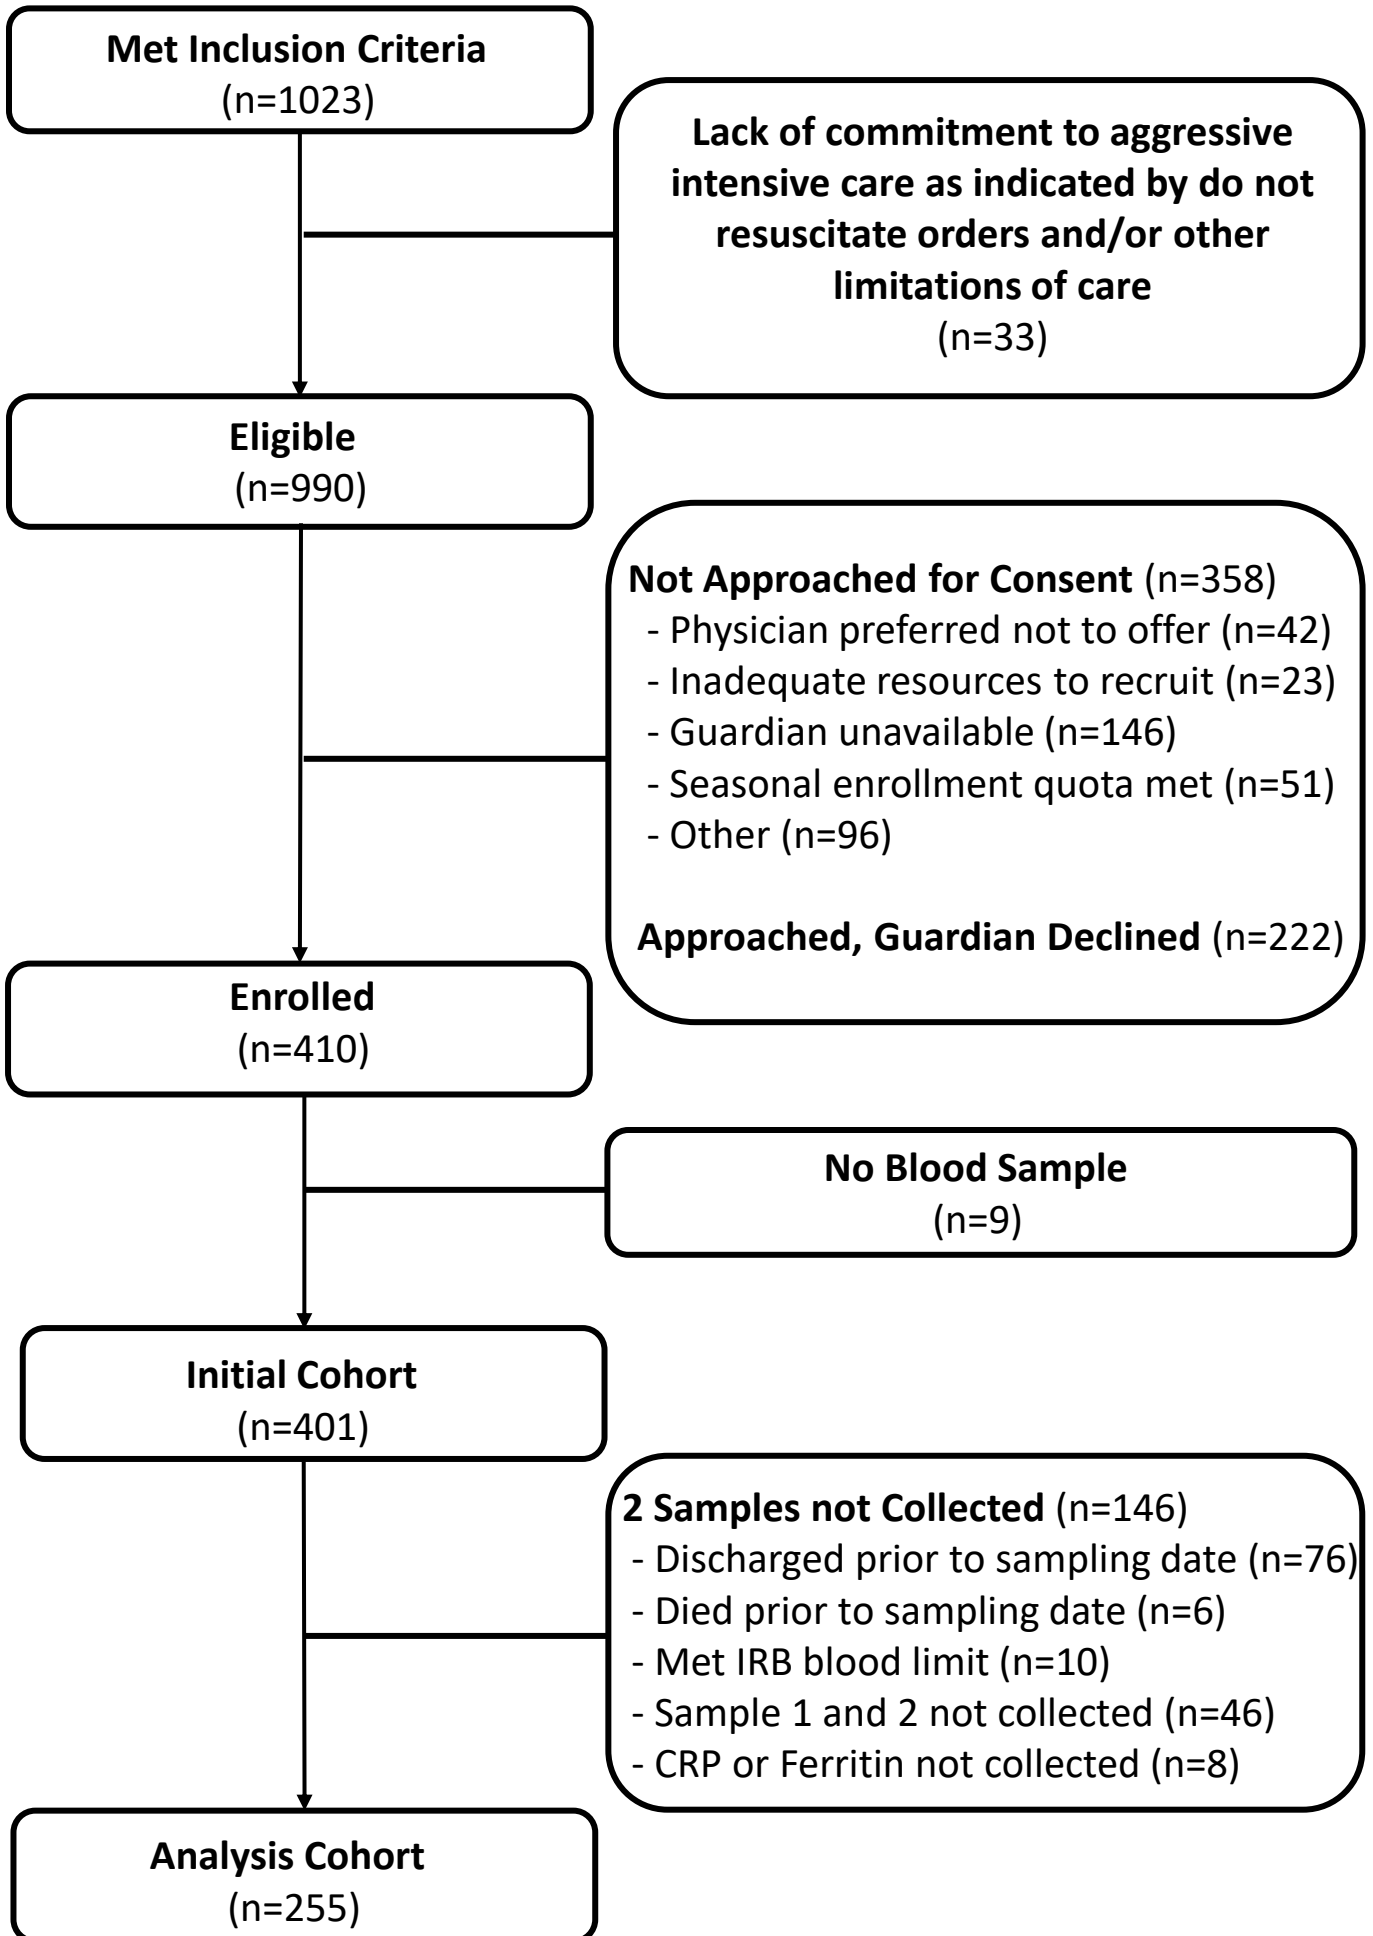

Supplement: NIHMS1826314-supplement-Supplemental_Data_File___doc___tif__pdf__etc___2.pdf [file NIHMS1826314-supplement-Supplemental_Data_File___doc___tif__pdf__etc___2.pdf]
